# Supplementary material for: In Silico Analysis of the Correlation of KIF2C with Prognosis and Immune Infiltration in Glioma
Source: PubMed Central journal article supplement (PMC8977321; doi:10.1155/2022/6320828), 2022-03-27

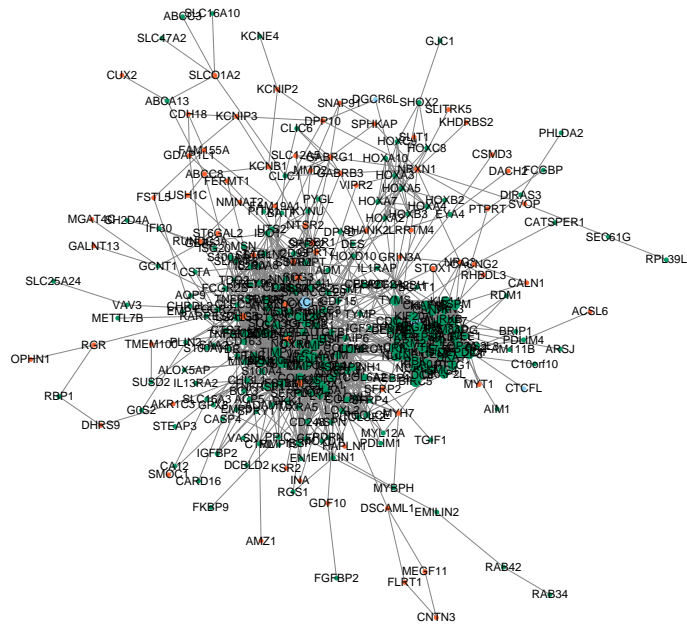

Supplement: 6320828.f1.pdf [file 6320828.f1.pdf]
